# Supplementary material for: Tailoring the nanoscale boundary cavities in rutile TiO2 hierarchical microspheres for giant dielectric performance
Source: Royal Society of Chemistry journal article supplement (doi:10.1039/c0jm01232g), 2010-01-01
Supplement: c0jm01232g.pdf [file c0jm01232g.pdf]

Electronic Supplementary Information (ESI) available for:

## Tailoring the nanoscale boundary cavities in rutile TiO<sub>2</sub> hierarchical microspheres for giant dielectric performance

Wanbiao Hu,<sup>a</sup> Liping Li,<sup>b</sup> Wenming Tong,<sup>a</sup> Guangshe Li<sup>a\*</sup>, Tingjiang Yan<sup>a</sup>

<sup>a</sup>State Key Laboratory of Structural Chemistry and <sup>b</sup>Key Laboratory of Optoelectronic Materials Chemistry and Physics, Fujian Institute of Research on the Structure of Matter and Graduate School of Chinese Academy of Sciences, Fuzhou 350002 (P. R. China),

Fax: (+) 86-591-83714946;

E-mail: guangshe@fjirsm.ac.cn.

### Supporting Online Materials

**S1.** XRD pattern of rutile TiO<sub>2</sub> prepared under hydrothermal conditions: 2.3 M, 160 °C, 2h.

**S2.** XPS spectra of the as-prepared rutile TiO<sub>2</sub> microspheres.

**S3.** TG analysis of as-prepared TiO<sub>2</sub> microspheres.

**S4.** TEM images of as-prepared TiO<sub>2</sub> microspheres.

**S5.** TEM image and SAED pattern of the microspheres after annealing at 900 °C for 2 h.

## (1) XRD

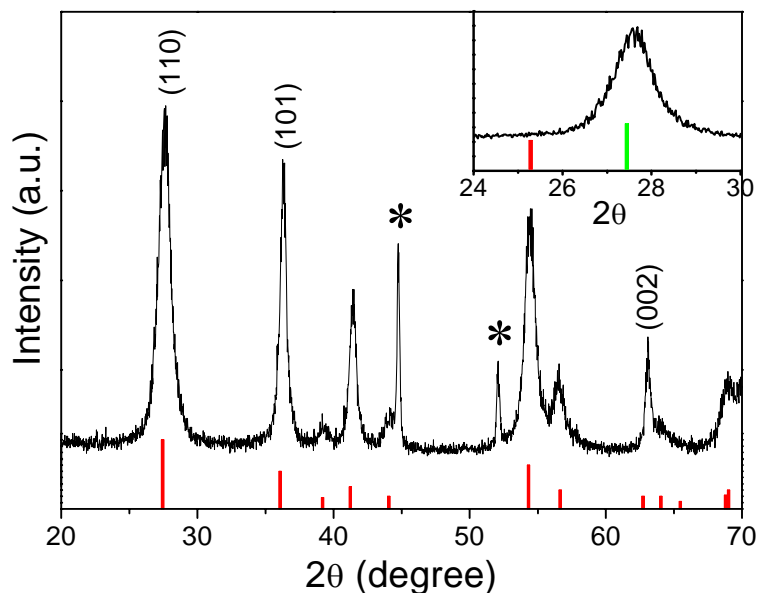

**S1.** XRD pattern of the sample prepared under an optimum condition of 2.3 M  $[\text{TiCl}_4]$  at 160 °C for 2h. Vertical bars denote the standard diffraction data of rutile  $\text{TiO}_2$  (JCPDS, No. 76-1940). Inset is the enlarged pattern in a narrow  $2\theta$  range. Vertical bars denote the standard diffraction data of anatase (left) and rutile (right)  $\text{TiO}_2$ , respectively. All diffraction data matched well the vertical bars below the pattern, the standard data for rutile  $\text{TiO}_2$ , confirming the formation of single phase. The intense diffraction lines like (110) and (101) indicate the high crystallinity. It is also noted that both lines (101) and (002) were significantly narrowed, relative to the line (110), which indicate a preferential orientation of the primary particles.

## (2) XPS

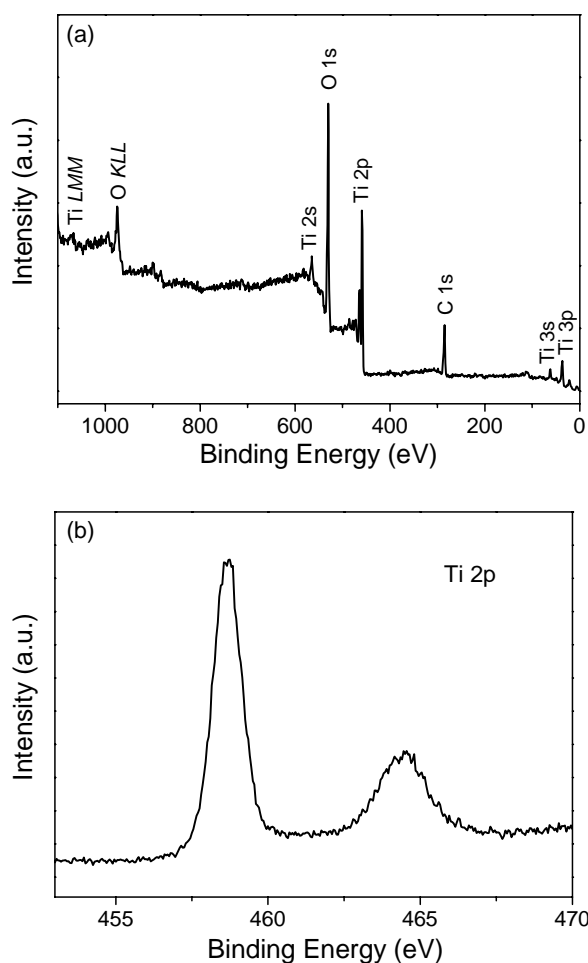

**S2.** XPS survey (a) and high-resolution (b) spectra of the as-prepared rutile TiO<sub>2</sub> microspheres. The XPS survey spectrum reveals that the peak contains only Ti, O, and C atoms. The carbon peak is attributed to the residual carbon from XPS instrument itself. No peak of Cl signal from reagent was detected. Ti 2p spectrum consists of the distinct Ti 2p<sub>1/2</sub> and Ti 2p<sub>3/2</sub> photoelectron signals that are located at 464.4 and 458.6 eV, respectively. The spin-orbital splitting between these peaks is 5.8 eV, which is comparable with that of 5.74 eV reported previously. Both Ti 2p signals are highly symmetric, and no shoulders were observed on the lower energy sides of Ti 2p<sub>3/2</sub> signal, which indicate that the rutile TiO<sub>2</sub> nanocrystals are stoichiometric and the concentration of lattice defects is extremely low.

### (3) TG

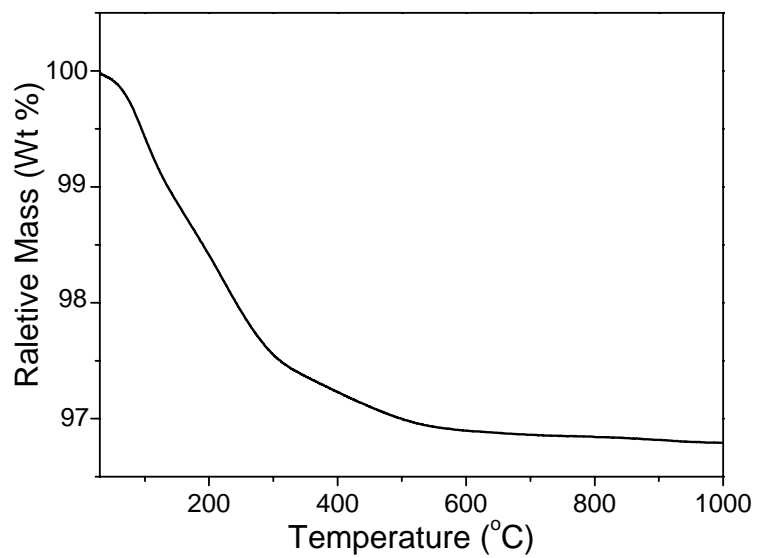

**S3.** TG analysis of as-prepared TiO<sub>2</sub> microspheres. It is indicated that water molecules adsorbed on the surfaces of the microspheres. The amount is estimated to be about 3.2 wt%, which would make a few contributions to the proton conductivity.

#### (4) TEM

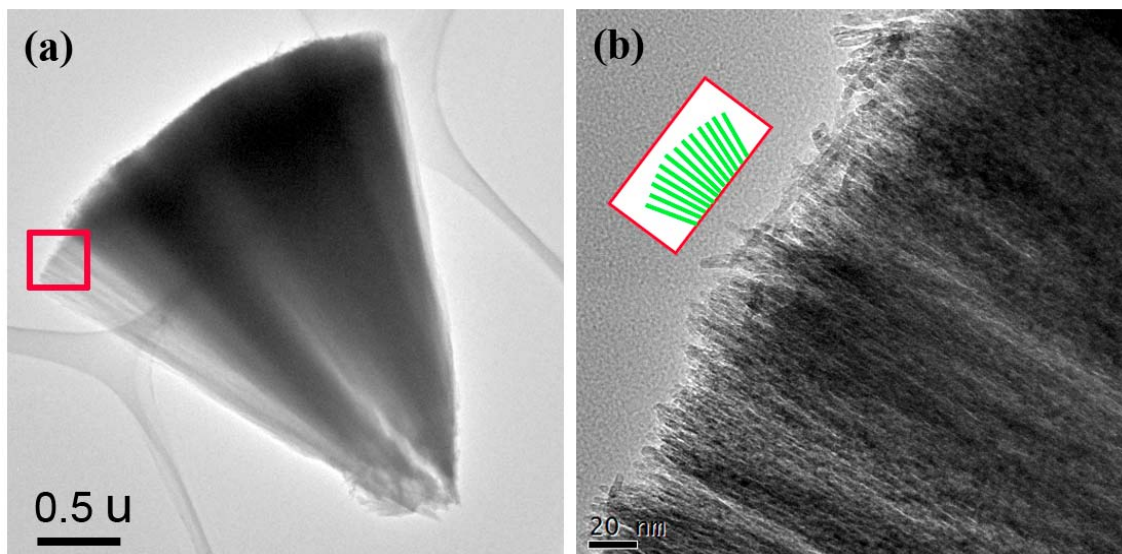

S4. TEM images of as-prepared TiO<sub>2</sub> microspheres: (a) overall morphology, and (b) a selected portion highlighted in (a). From images, it is observed that boundary cavities exist in between the nanowires, as distinctly described in inset of (b).

## (5) TEM and SAED

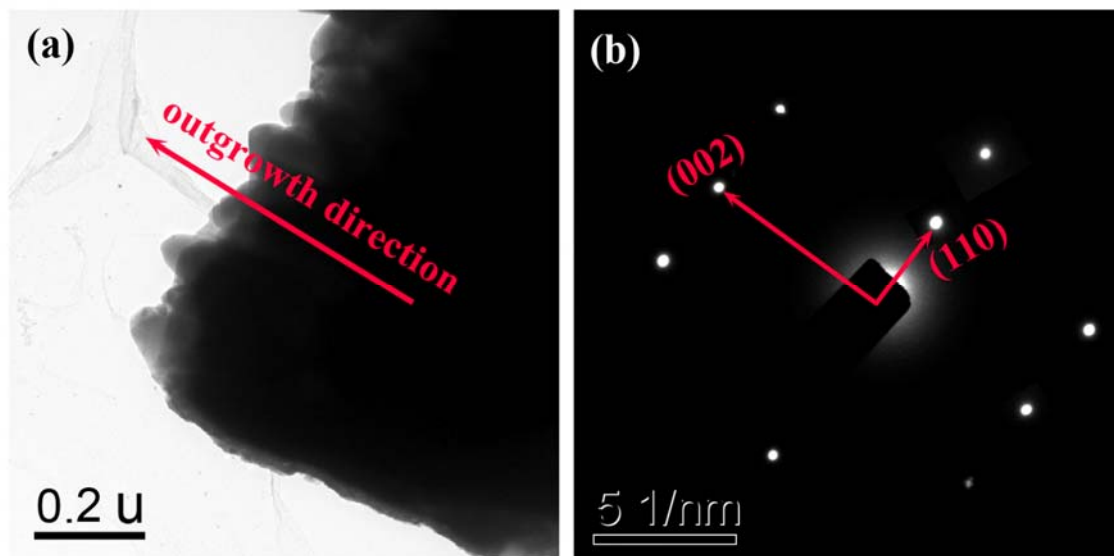

**S5.** (a) TEM image and (b) SAED pattern of the microspheres after annealing at 900 °C for 2 h. It can be seen that the nanowires have grown into nanorods. Meanwhile, the electron diffraction pattern consists of 2-dimension array dots of regularly round shape. These observations indicate that the nanoscale boundary cavities disappeared after annealing.
